# Supplementary material
Source: HighWire-hosted journal article supplement (doi:10.1101/rna.070953.119)
Supplement: Supplemental_Table_1.xlsx [file Supplemental_Table_1.xlsx]

## Sheet: Oligonucleotides
Oligonucleotides used in this study
	Oligonucleotide sequence (5'-3')
Fragment analysis
SMARCA5 Universal Donor	/5Phos/CTTTTGTTTTTCTCTGGCCGTCGTTTTAC-FAM
SMARCA5 Linear Acceptor	CTGTGAATGCAAT
SMARCA5 circ Acceptor	TCCACAAGCCTCC
DOCK1 Universal Donor	/5Phos/AATGAGTTCAGAACTGGCCGTCGTTTTAC-FAM
DOCK1 Linear Acceptor	CCACGAAGTTTCC
DOCK1 circ Acceptor	TAGTTATAAAAAG
SplintQuant Primers
SMARCA5_Universal Donor_M13F	/5Phos/CTTTTGTTTTTCTCTGGCCGTCGTTTTAC
SMARCA5 Linear Acceptor_M13R	CAGGAAACAGCTATGACCTGTGAATGCAAT
SMARCA5 circ Acceptor_M13R	CAGGAAACAGCTATGACTCCACAAGCCTCC
DOCK1_Universal Donor_M13F	/5Phos/AATGAGTTCAGAACTGGCCGTCGTTTTAC
DOCK1 Linear Acceptor_M13R	CAGGAAACAGCTATGACCCACGAAGTTTCC
DOCK1 circ Acceptor_M13R	CAGGAAACAGCTATGACTAGTTATAAAAAG
MLL e9-10_circ Donor_M13F	/5Phos/CTCTACATGCCCACTGGCCGTCGTTTTAC
MLL e9-10 circ Acceptor_M13R	CAGGAAACAGCTATGACGAGGTGGTTTTTC
AF4 e3-4_circ Donor_M13F	/5Phos/CTCAACTGACTGACTGGCCGTCGTTTTAC
AF4 e3-4 circ Acceptor_M13R	CAGGAAACAGCTATGACGTCATTGTACAAA
MLL Donor_M13F	/5Phos/CTTTTCTTTTGGTCTGGCCGTCGTTTTAC
MLL Acceptor_M13R	CAGGAAACAGCTATGACGAGGTGGTTTTTC
AF4 Donor_M13F	/5Phos/CTTCAGAATCTCTCTGGCCGTCGTTTTAC
AF4 Acceptor_M13R	CAGGAAACAGCTATGACAATGGGTCATTTC
syncirc1_donor_M13F	/5Phos/GTAATCAACGCCGctggccgtcgttttac
syncirc1_acceptor_M13R	caggaaacagctatgacTGACCCGTATGAC
syncirc2_donor_M13F	/5Phos/ACTCACTCGAGATctggccgtcgttttac
syncirc2_acceptor_M13R	caggaaacagctatgacCATAGATAGTCCC
syncirc3_donor_M13F	/5Phos/TGCTCACATGATActggccgtcgttttac
syncirc3_acceptor_M13R	caggaaacagctatgacTGGTTCATCACCC
syncirc4_donor_M13F	/5Phos/GCGCAACCTCCTGctggccgtcgttttac
syncirc4_acceptor_M13R	caggaaacagctatgacTTAAGTCGATCCC
syncirc5_donor_M13F	/5Phos/AACTAACGCCGGGctggccgtcgttttac
syncirc5_acceptor_M13R	caggaaacagctatgacTCGCGGCACTCCC
syncirc6_donor_M13F	/5Phos/GGAGAGCTACAATctggccgtcgttttac
syncirc6_acceptor_M13R	caggaaacagctatgacGATAGTATCTCCC
synlinear1_donor_M13F	/5Phos/GCTTATCCCGAGGctggccgtcgttttac
synlinear1_acceptor_M13R	caggaaacagctatgacCTTGTCACCGTCA
synlinear2_donor_M13F	/5Phos/CCAAATTAGACCTctggccgtcgttttac
synlinear2_acceptor_M13R	caggaaacagctatgacGGCGGAATACGTT
synlinear3_donor_M13F	/5Phos/TATGTCTGTCACGctggccgtcgttttac
synlinear3_acceptor_M13R	caggaaacagctatgacATCACGCTTAACG
synlinear4_donor_M13F	/5Phos/CAACGAGTGGTTCctggccgtcgttttac
synlinear4_acceptor_M13R	caggaaacagctatgacAGAAAGACCGATC
synlinear5_donor_M13F	/5Phos/GCATTCAGGTAGGctggccgtcgttttac
synlinear5_acceptor_M13R	caggaaacagctatgacGAGGTAAGCCGAT
synlinear6_donor_M13F	/5Phos/TGGTATTAATGCGctggccgtcgttttac
synlinear6_acceptor_M13R	caggaaacagctatgacCTAAGCCCAGATG
GAPDH_donor_M13F	/5Phos/GGGCAATGCCAGCctggccgtcgttttac
GAPDH_acceptor_M13R	caggaaacagctatgacAAGTGGTCGTTGA
	Forward Primer sequence (5'-3')	Reverse Primer sequence (5'-3')		Product length	Sequence (5'-3', backsplice junction highlighted in bold)
Overlap PCR for synthesis of in vitro transcription templates
T7_SMARCA5_linear	TAATACGACTCACTATAGGGTTATAACTTCGAAGGAGAAGACTATAGAGAAAAACAAAAG	TTTCTCGTTTAGGTGGTTCAATCCACTCTGTGAATGCAATCTTTTGTTTTTCTCTATAGT			TAATACGACTCACTATAGGGTTATAACTTCGAAGGAGAAGACTATAGAGAAAAACAAAAGATTGCATTCACAGAGTGGATTGAACCACCTAAACGAGAAA
T7_SMARCA5_circRNA	TAATACGACTCACTATAGGGTTATAACTTCGAAGGAGAAGACTATAGAGAAAAACAAAAG	TCTTTCCCAATTTTGTTCAGATTCTGATCCACAAGCCTCCCTTTTGTTTTTCTCTATAGT			TAATACGACTCACTATAGGGTTATAACTTCGAAGGAGAAGACTATAGAGAAAAACAAAAGGGAGGCTTGTGGATCAGAATCTGAACAAAATTGGGAAAGA
T7_DOCK1_linear	TAATACGACTCACTATAGGGCCGAACCGTCATTTCCATGGGACGAGATTCTGAACTCATT	TTTGTCGTAAAATAGCTGTCATGCAAGCCACGAAGTTTCCAATGAGTTCAGAATCTCGTC			TAATACGACTCACTATAGGGCCGAACCGTCATTTCCATGGGACGAGATTCTGAACTCATTGGAAACTTCGTGGCTTGCATGACAGCTATTTTACGACAAA
T7_DOCK1_circRNA	TAATACGACTCACTATAGGGCCGAACCGTCATTTCCATGGGACGAGATTCTGAACTCATT	GAAAGTTCATCCGCTCCTCTGGCATCATAGTTATAAAAAGAATGAGTTCAGAATCTCGTC			TAATACGACTCACTATAGGGCCGAACCGTCATTTCCATGGGACGAGATTCTGAACTCATTCTTTTTATAACTATGATGCCAGAGGAGCGGATGAACTTTC
qRT-PCR (bases flanking circRNA backsplice in bold)
circSMARCA5			From Conn et al (2015) Cell 160: 1125-1134
SMARCA5 linear			From Conn et al (2015) Cell 160: 1125-1134
circDOCK1	AACCCAGAGGCACGTCCA	AAGAAAGTTCATCCGCTCCT		133bp	AACCCAGAGGCACGTCCAGATTATCATGGAGAAACTTCTCCGGACCGTGAACCGAACCGTCATTTCCATGGGACGAGATTCTGAACTCATTCTTTTTATAACTATGATGCCAGAGGAGCGGATGAACTTTCTT
DOCK1 linear	GCTGAAGGAAAAGGTGGAGA	CCGATGAGAGGGAAGAGACA		158bp	GCTGAAGGAAAAGGTGGAGAAAGAGTACGGCGTCCGAATCATGCCCTCAAGTCTGGATGATAGAAGAGGCAGCCGCCCCCGGTCCATGGTGCGGTCCTTCACGATGCCTTCCTCATCCCGCCCTCTGTCTGTGGCCTCTGTCTCTTCCCTCTCATCGG
circHIPK3			From Memczak et al (2013) Nature 495: 333-338
HIPK3 linear	CGCCCGAAGAGGAGAGA	CACAACTGCTTGGCTCTACTT		139bp
GAPDH linear			From Conn et al (2015) Cell 160: 1125-1134
M13	GTAAAACGACGGCCAG	CAGGAAACAGCTATGAC
SynCirc1_circRNA	AAGAGTTAGCACCCACCATTG	CCGTCCATAGTCCCAGAGAA
SynCirc2_circRNA	GGCATCAAGTCCACGAGTTA	TAGGGGCAATCTTCCACAG
SynCirc3_circRNA	GCTCGTCACCAACTCGTCA	GTTCATCACCCTGCTCACAT
SynCirc4_circRNA	AGACTTCGCCTCCACAGACC	CGCTACTCTCCTGGTGTAACTT
SynCirc5_circRNA	GCATCGGCTTACCTCCAAC	ATCGGCACCACTCTTGTTCT
SynCirc6_circRNA	TCAGAACCTGCTCGGTATCC	TTATCCCGGTGAGCTACGAG
SynCirc1_linear	AGGTTTCCCCCTAATCGAGA	TAATAGCCTTCAGTGACTGTGAG
SynCirc2_linear	GGAGTAAGAGCGGAAACTGG	GGAGCGCAGCCTCGGCTG
SynCirc3_linear	CTCGCGGGGGTCATAAATA	TTACCATCTCATAAATAGACATAACAC
SynCirc4_linear	CTCGTTGGATCGGTCTTTCT	CCGGAAGGTTGATCTGCTCG
SynCirc5_linear	ACAAGAGTGGTGCCGATCTC	ATTCAGGTAGGCGCAAAACC
SynCirc6_linear	CACTATTGAGGCACCCGTTC	TCACACTGAGTCCATGAGAGGC

## Sheet: IVT synthetic circRNAs
Synthetic DNA fragments and Oligonucleotides used in this study to generate IVT RNAs
	Origin of synthetic sequence	Product length (nt)	Sequence (5'-3'), T7 promoter underlined
Synthetic gBlock DNA fragments for T7 IVT
SynCirc1	Modified Sequence >DQ854994.1 Synthetic construct clone AG006.0011 external RNA control sequence	402	AGTTAATACGACTCACTATAGTCATACGGGTCAATTTATCCTAGCTCTGCAGATTGTCTCGTACCGCTTTCTCTGGGACTATGGACGGGCACGCTCATATCAGGCTATATTTGGTCCGGGTTATTATCGTCGCGGTTACCGTAATACTTCAGATCAGTTAAGTAGGGCCATATGCCTCGGGATAAGCTGACGGTGACAAGGTTTCCCCCTAATCGAGACGGAGCAATAACACAGGGGCATACAGTAACGTGGCAAGAGTTCAATCGCTTAGTTACGAGCGGGATTTGAGGAACTGCGACTGTTCTTAACCAAACATCCGTGCGATTCGTGCCACTCGTAGACGGCATCTCACAGTCACTGAAGGCTATTAAAGAGTTAGCACCCACCATTGGATTAATA…
SynCirc2	Modified Sequence >DQ854997.1 Synthetic construct clone AG009.0011 external RNA control sequence	403	AGTTAATACGACTCACTATAGGGACTATCTATGAGCACCTATTGCGCTGTGGAAGATTGCCCCTAGTCTCTGTCCGATTGCGGGATGAACTGGTTGGTCCGAGGAGGCTATAGGATACGATGGGCACGCGCTATTCAGACGTATTTGGTATGGAGTAAGAGCGGAAACTGGGCTCGATTGATATACCCACCGACGGTATGGTCATTAATACCCAGTATTGACTAGTCGGAGGTCTAATTTGGAACGTATTCCGCCGCAGATTGATCGCCGGGCGAGTATTATTGCTCGACCTTCGCCTGCCCTCAGCTGCGCCCTTTTTGTCCACGGCGCGGGCTGGACCAAGCAGCCGAGGCTGCGCTCCGGCATCAAGTCCACGAGTTACAGCCAGCGGGTTTTAAG…
SynCirc3	Modified Sequence >DQ854995.2 Synthetic construct clone AG006.1100 external RNA control sequence	400	AGTTAATACGACTCACTATAGGGTGATGAACCACTCGGTATCGTGCAGACAGGGATCGTATGGCGATCCAGTATACCTTAGTCACATATACTATCGTAATATTGGCGGTTGCTGACAAGTAAATACGGCTAAACCGGTCGTTGACCAACCACTCTCGCGGGGGTCATAAATATCACTGAGCCCGGGAAGTACCCCGTGACAGACATACGTTAAGCGTGATAACGTATTCGTAGGTATTATTTCCGTTAGCTGGATGTAAAGCGGTTCTGGTCCTAGTAGTGTTATGTCTATTTATGAGATGGTAAGCTCGTCACCAACTCGTCACGCGATCGAAATAGCTTGACTAATGTCCGGCACATAATCAAGTCTACATCAATCATGAATGGTTCTGATTTGCTT…
SynCirc4	Modified Sequence >DQ883646.3 Synthetic construct external RNA control ERCC-00142 sequence	395	AGTTAATACGACTCACTATAGGGATCGACTTAAGGGTGCAGCGACCACGGCGGATCGGGCGTCGCAATAGTCCTCCTGTTATCCTTCTAATGTTATCGCCCGTAGATTAGTCATATACTTGCTAGTACCTATCTGCGTTAGATATGATTTAAGTTACACCAGGAGAGTAGCGAGATAGAACCACTCGTTGGATCGGTCTTTCTTAATTGACTACTACAGAACCGTCCAAGGCGCTGAGGTCAAACTACATTACTGGCCCTGGTTTCCATGCGTCACGCAAGTACAGCGAGCAGATCAACCTTCCGGAGACTTCGCCTCCACAGACCGGAGACCCTAACCGTACCCAAATGTAACAATGCGCCTCTGGTGTGAGCTAACTACAAAGTAGGCCGGGCCGGT…
SynCirc5	Modified Sequence >DQ854992.1 Synthetic construct clone AG003.0011 external RNA control sequence	203	AGTTAATACGACTCACTATAGGGAGTGCCGCGACACAACATCCGCTAGCCTCAGTCGAATGACAAGTTAGAACAAGAGTGGTGCCGATCTCTGCAAACTCCTATTGTCAGGGGTGGTGGACGGTATAGGGTTTTGCGCCTACCTGAATGCATCGGCTTACCTCCAACGGCTTAGATGTGCCTAGAAGGTACGCCCTTCAGTCAAGACCGGCCCGGCGTTAGTT
SynCirc6	Modified Sequence >DQ459412.1 Synthetic construct microarray control MC01 mRNA, complete sequence	584	AGTTAATACGACTCACTATAGGGAGATACTATCACGCGACCTATGTGCATATCTTCGATTCTCCGAGTGTCACCGATCCGTAGGAAATTCCTTCCCATGCGTGTGCAATACTCGTAGCTCACCGGGATAAATAGGAAGGAAACATCCGCGGGTCTTACGGTGAAGCTGTGGGACCGCTTCTGTACACGGCGTCCAATCAAGGGGCTTGGCATTTGGCCCCAGATCAAAGTGTTGAACCACAAACGACTCTATCGGTGACGCCTCCAAGCGCGAAACTCCAGGCATTGGGGAACCGCAGAAAGATGTTCCGCTAGACCGCATTAATACCACATCTGGGCTTAGAAGCCCCTCGGTGCTCCAGGGAGGACGGATCGGAATTAAACGTGATATGGAACTTTA…
	Forward Primer sequence (5'-3')	Reverse Primer sequence (5'-3')
Amplification of synthetic constructs for in vitro transcription
SynCirc1	AGTTAATACGACTCACTATAG	GTAATCAACGCCGCAACTTT
SynCirc2		ACTCACTCGAGATCGTAATA
SynCirc3		TGCTCACATGATATCTGATC
SynCirc4		GCGCAACCTCCTGTCGACCG
SynCirc5		AACTAACGCCGGGCCGGTCT
SynCirc6		GGAGAGCTACAATAGGCGGA
	Splint sequence (5'-3'; bases either side of backspice junction shown in bold)
Circularisation of IVT RNAs (DNA splint spanning backsplice junction)
SynCirc1_Splint	GATAAATTGACCCGTATGACGTAATCAACGCCGCAACTTT
SynCirc2_Splint	AGGTGCTCATAGATAGTCCCACTCACTCGAGATCGTAATA
SynCirc3_Splint	TACCGAGTGGTTCATCACCCTGCTCACATGATATCTGATC
SynCirc4_Splint	TGCACCCTTAAGTCGATCCCGCGCAACCTCCTGTCGACCG
SynCirc5_Splint	TGTTGTGTCGCGGCACTCCCAACTAACGCCGGGCCGGTCT
SynCirc6_Splint	GTCGCGTGATAGTATCTCCCGGAGAGCTACAATAGGCGGA
